# Supplementary material for: De novo MYC addiction as an adaptive response of cancer cells to CDK4/6 inhibition
Source: PubMed Central journal article supplement (PMC5658703; doi:10.15252/msb.20167321), 2017-10-04

# Figure 5.A

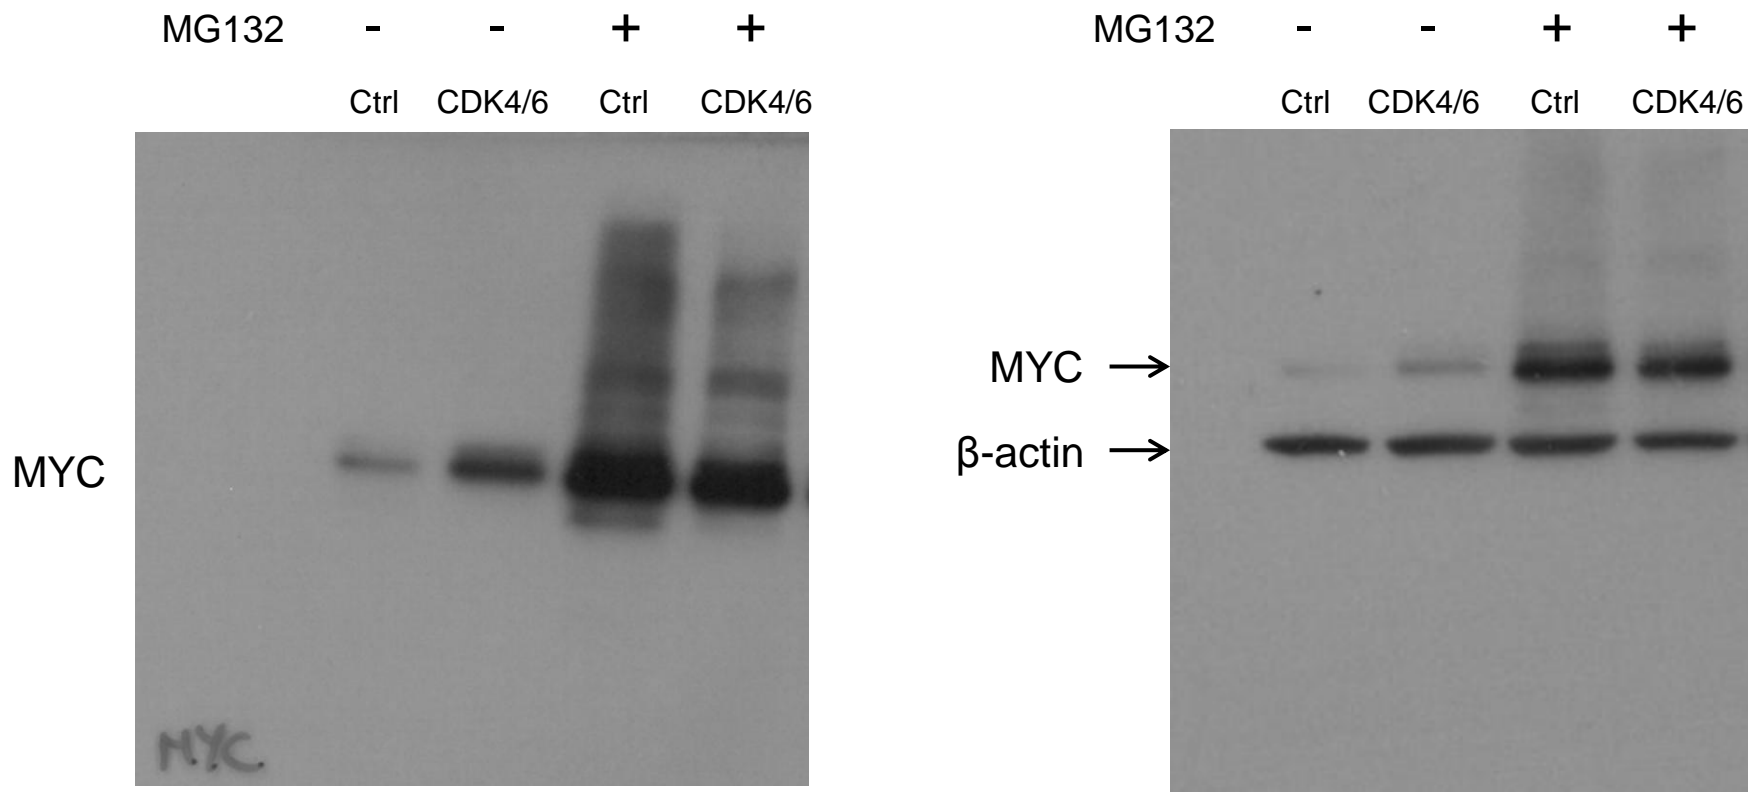

# Figure 5.C

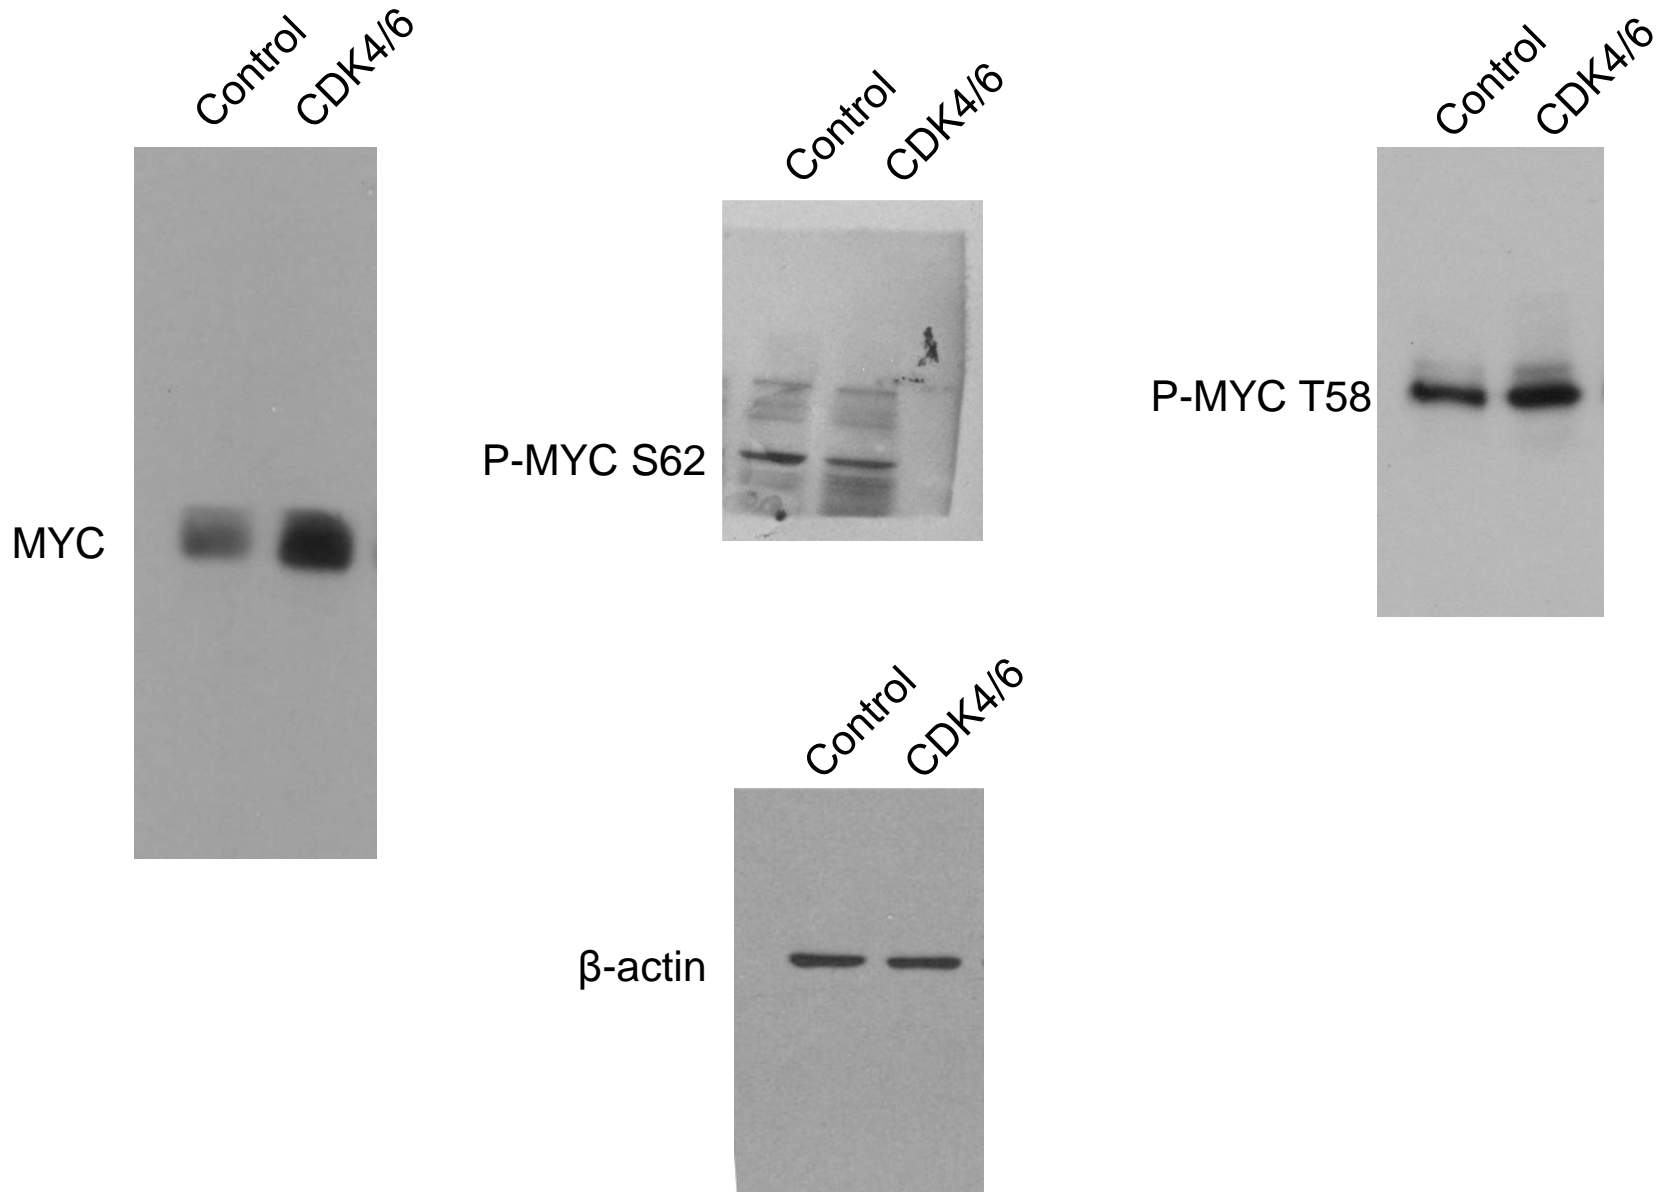

# Figure 5.E

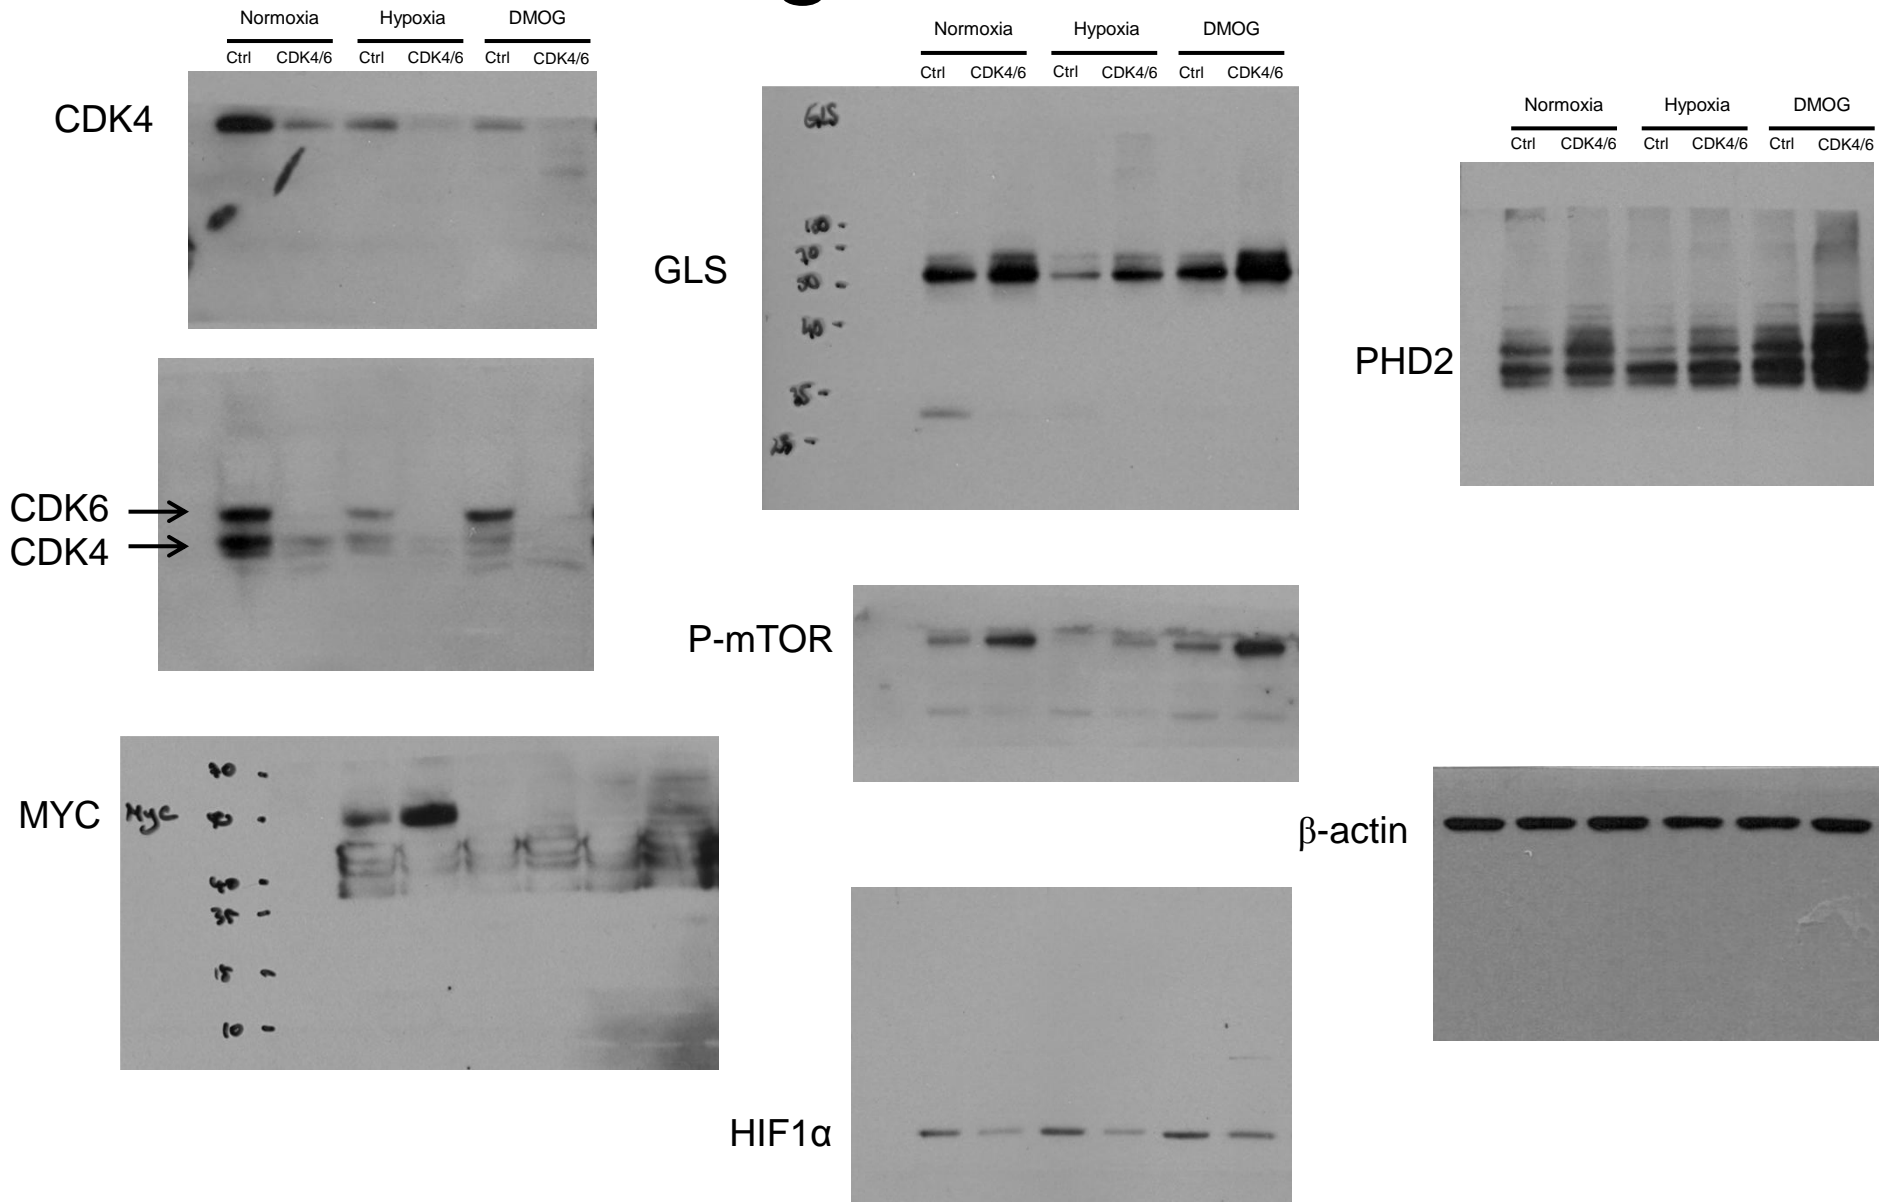

# Figure 5.G

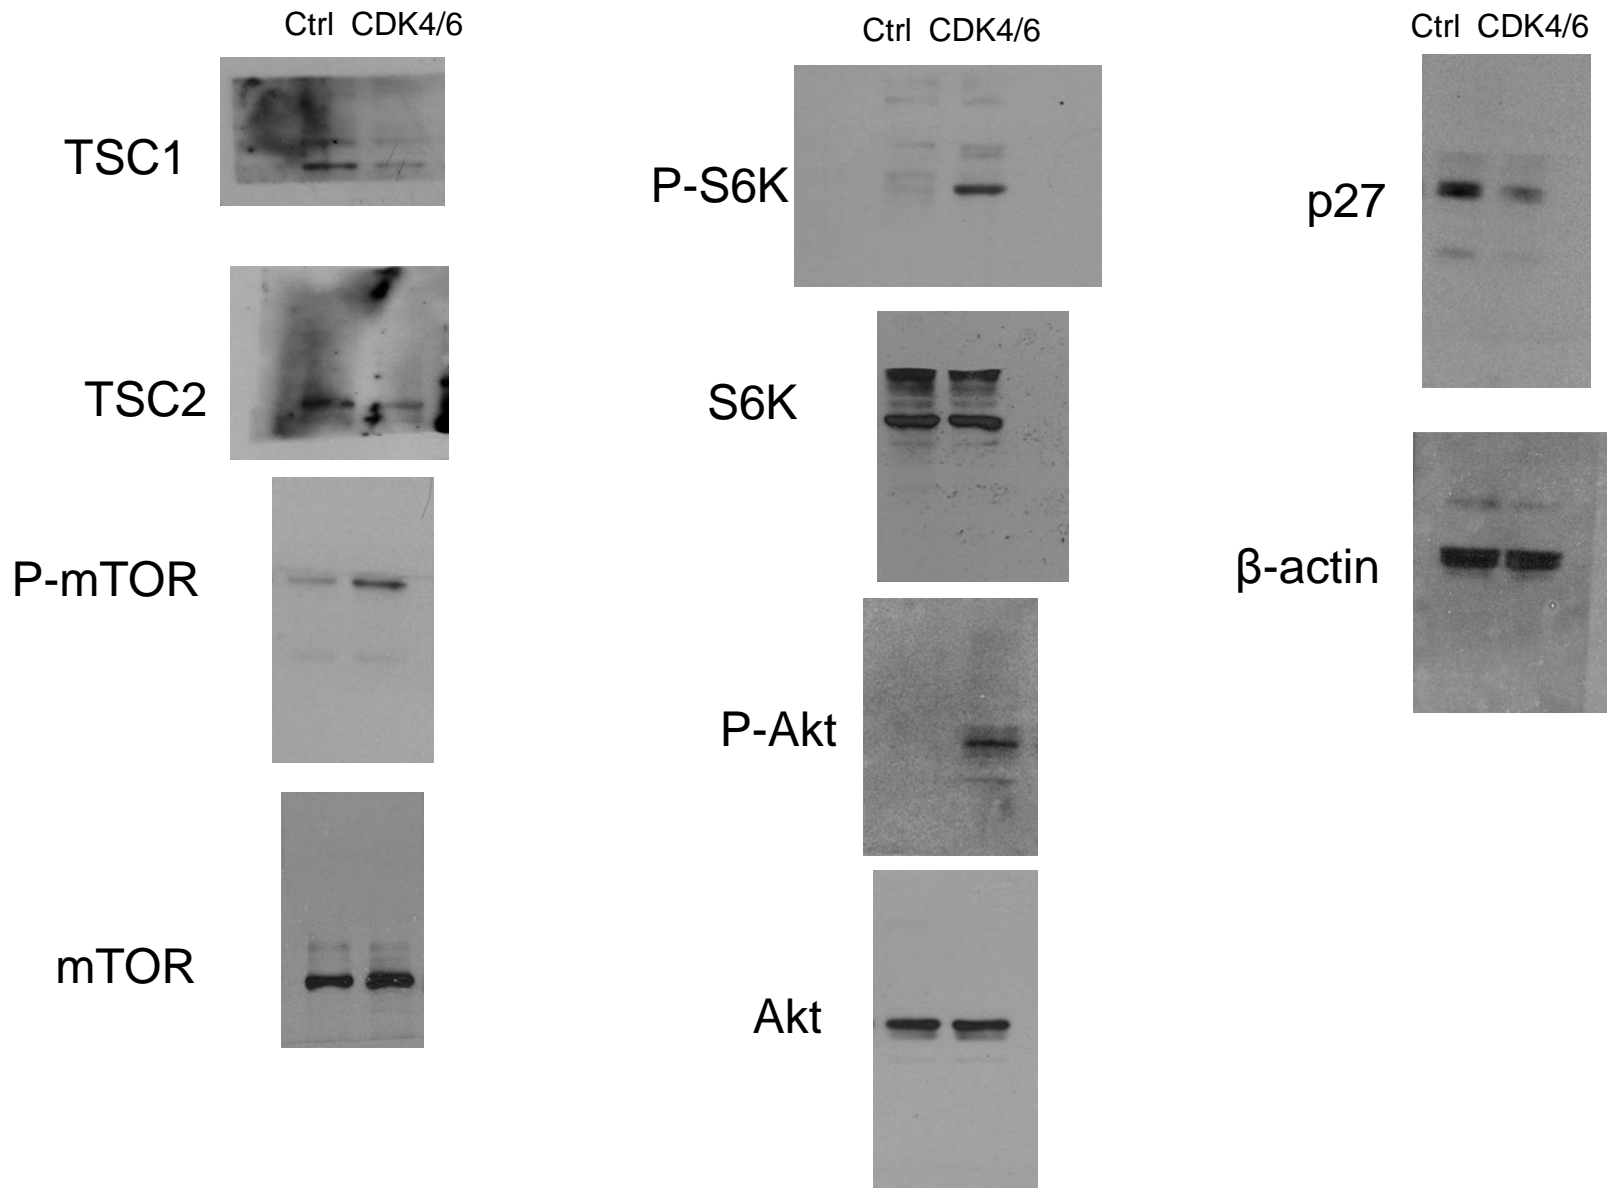

# Figure 5.H

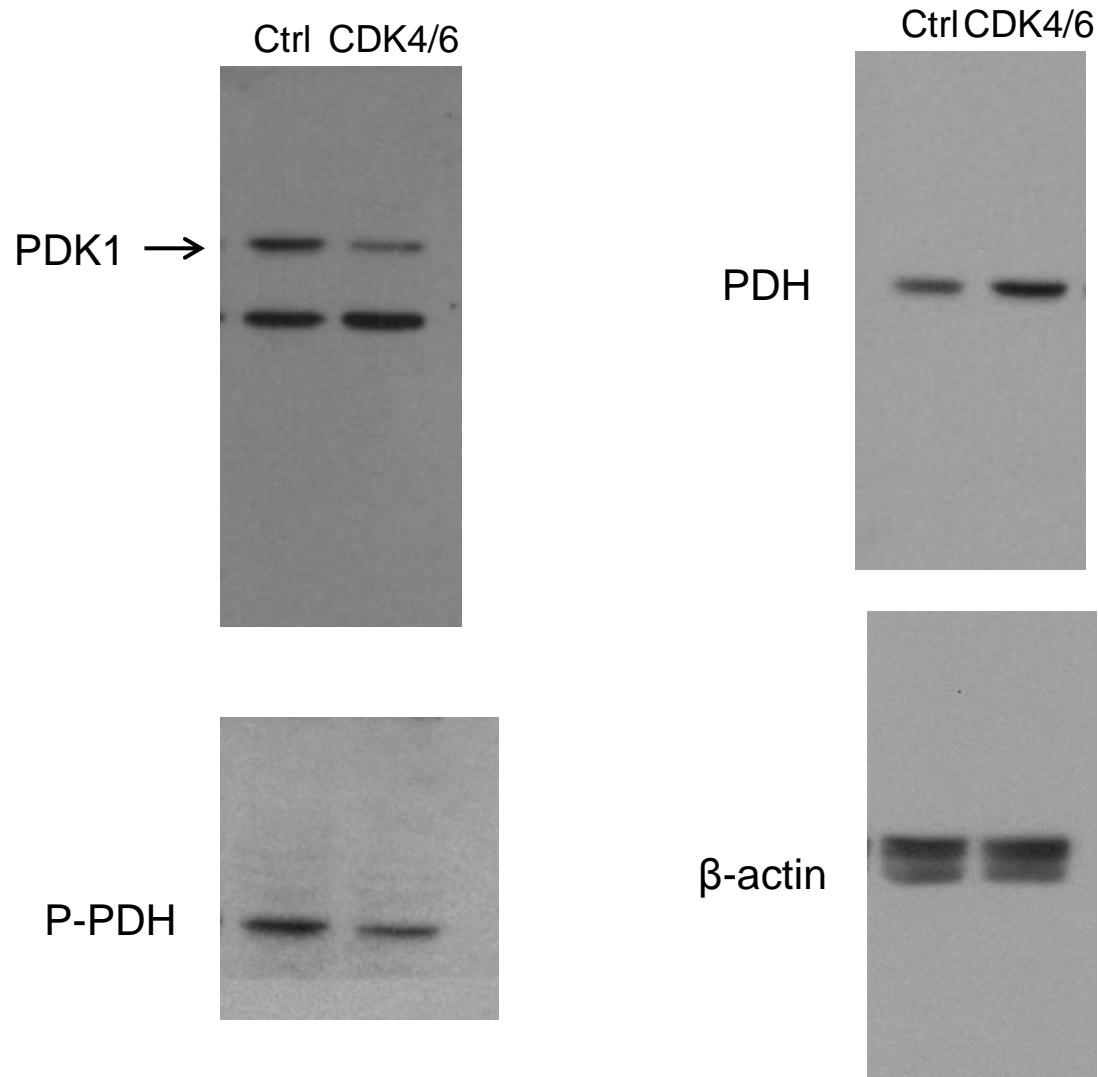

# Figure 5.J

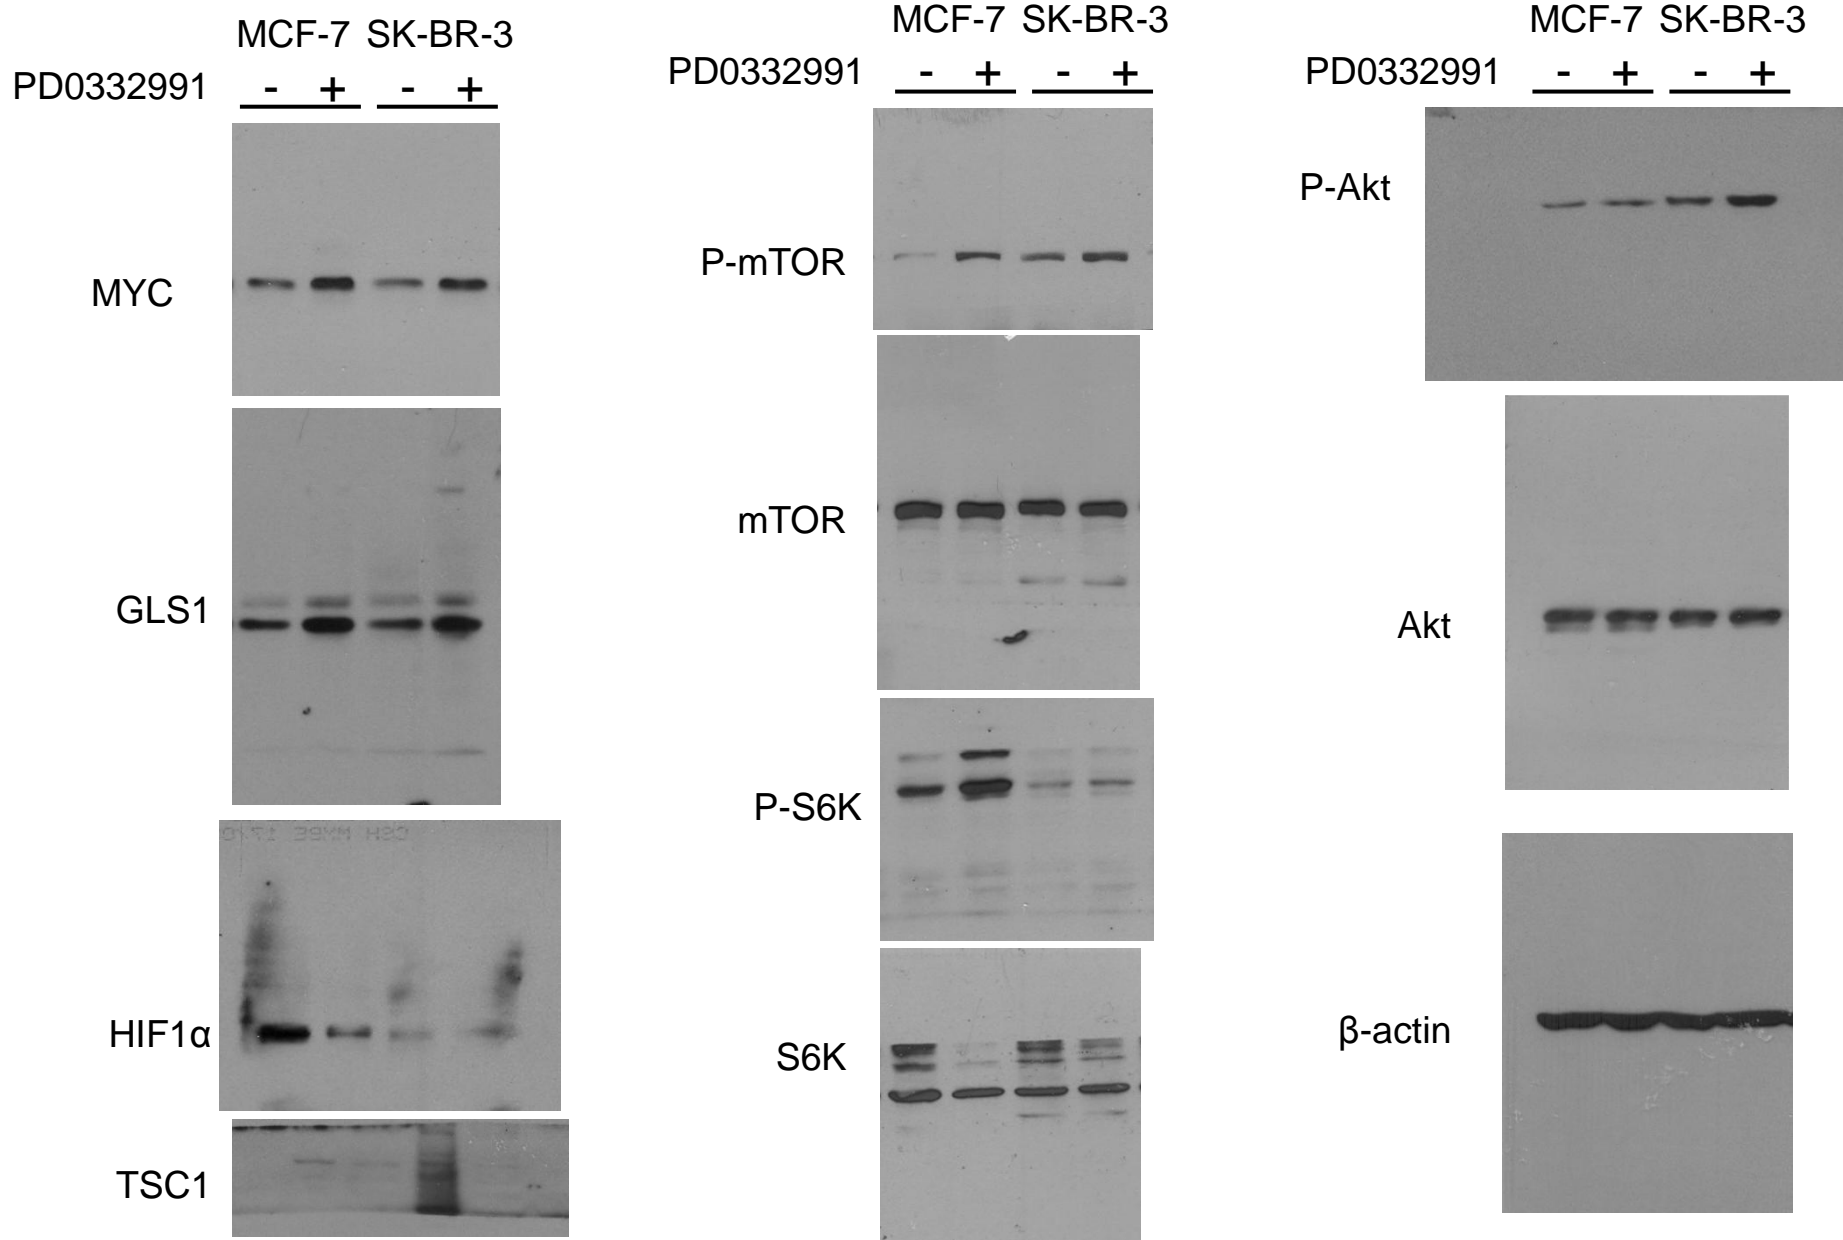

# Figure 5.L

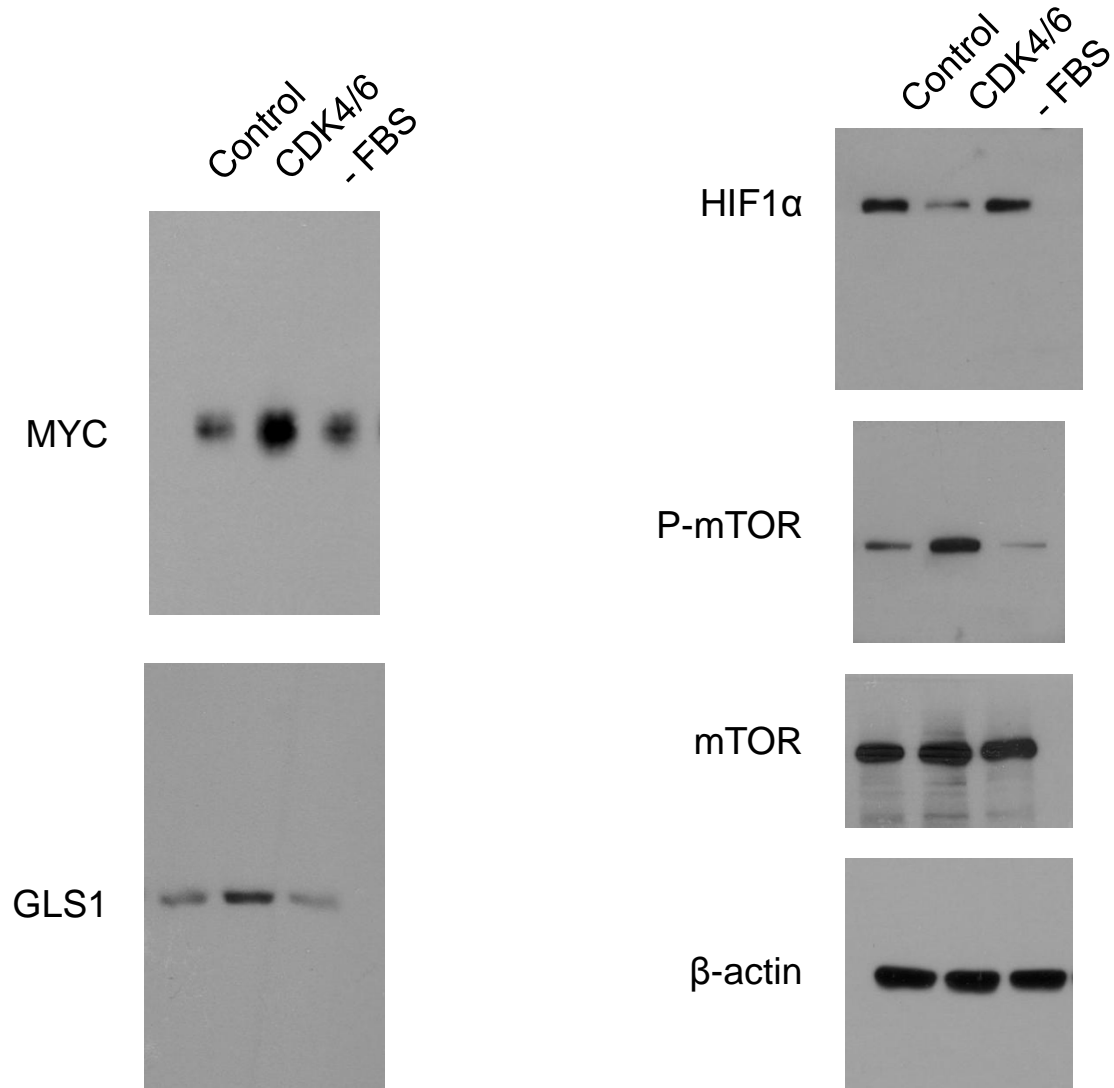

Supplement: MSB-13-940-s008.pdf [file MSB-13-940-s008.pdf]
