# Supplementary material for: De novo MYC addiction as an adaptive response of cancer cells to CDK4/6 inhibition
Source: PubMed Central journal article supplement (PMC5658703; doi:10.15252/msb.20167321), 2017-10-04

# Figure 6.A

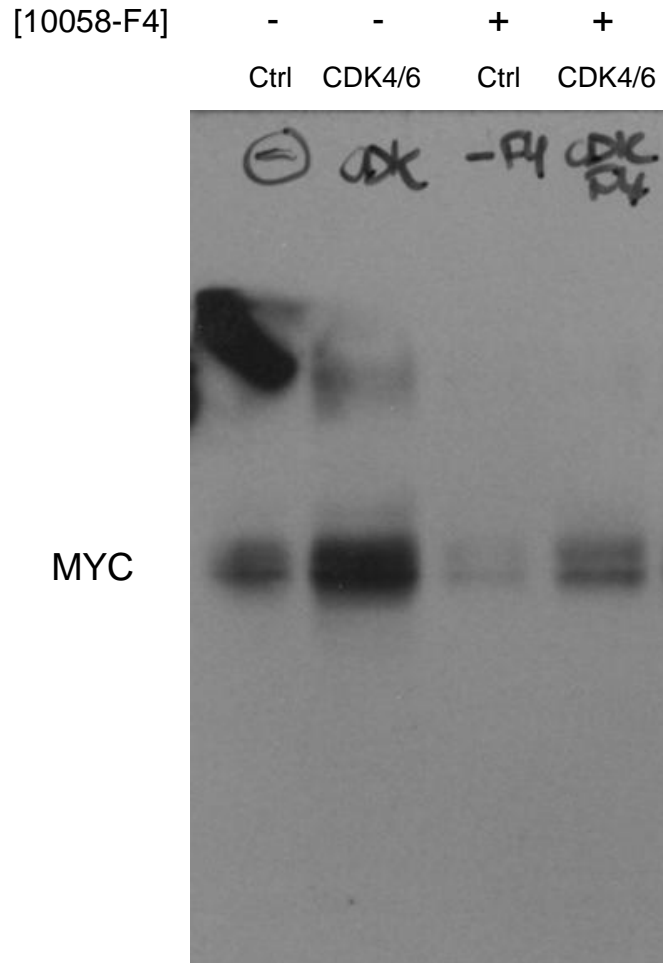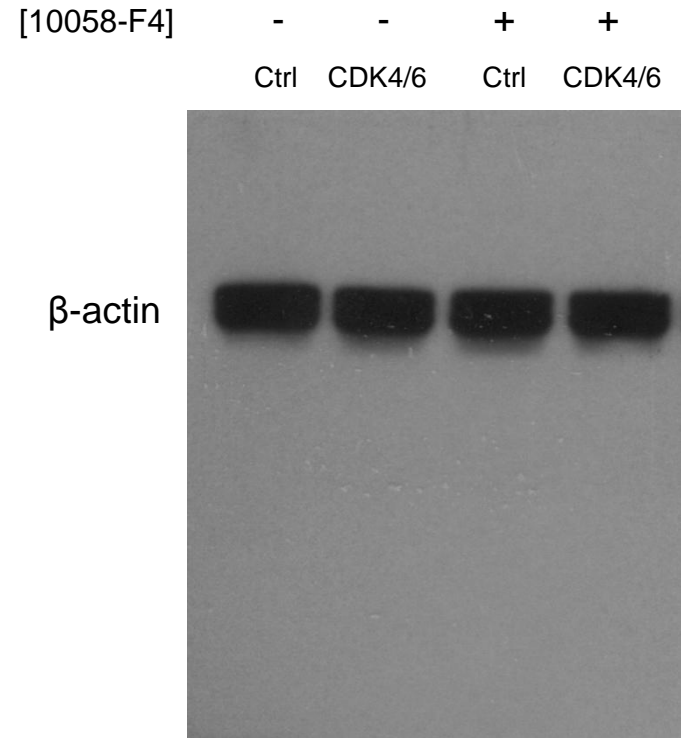

# Figure 6.B

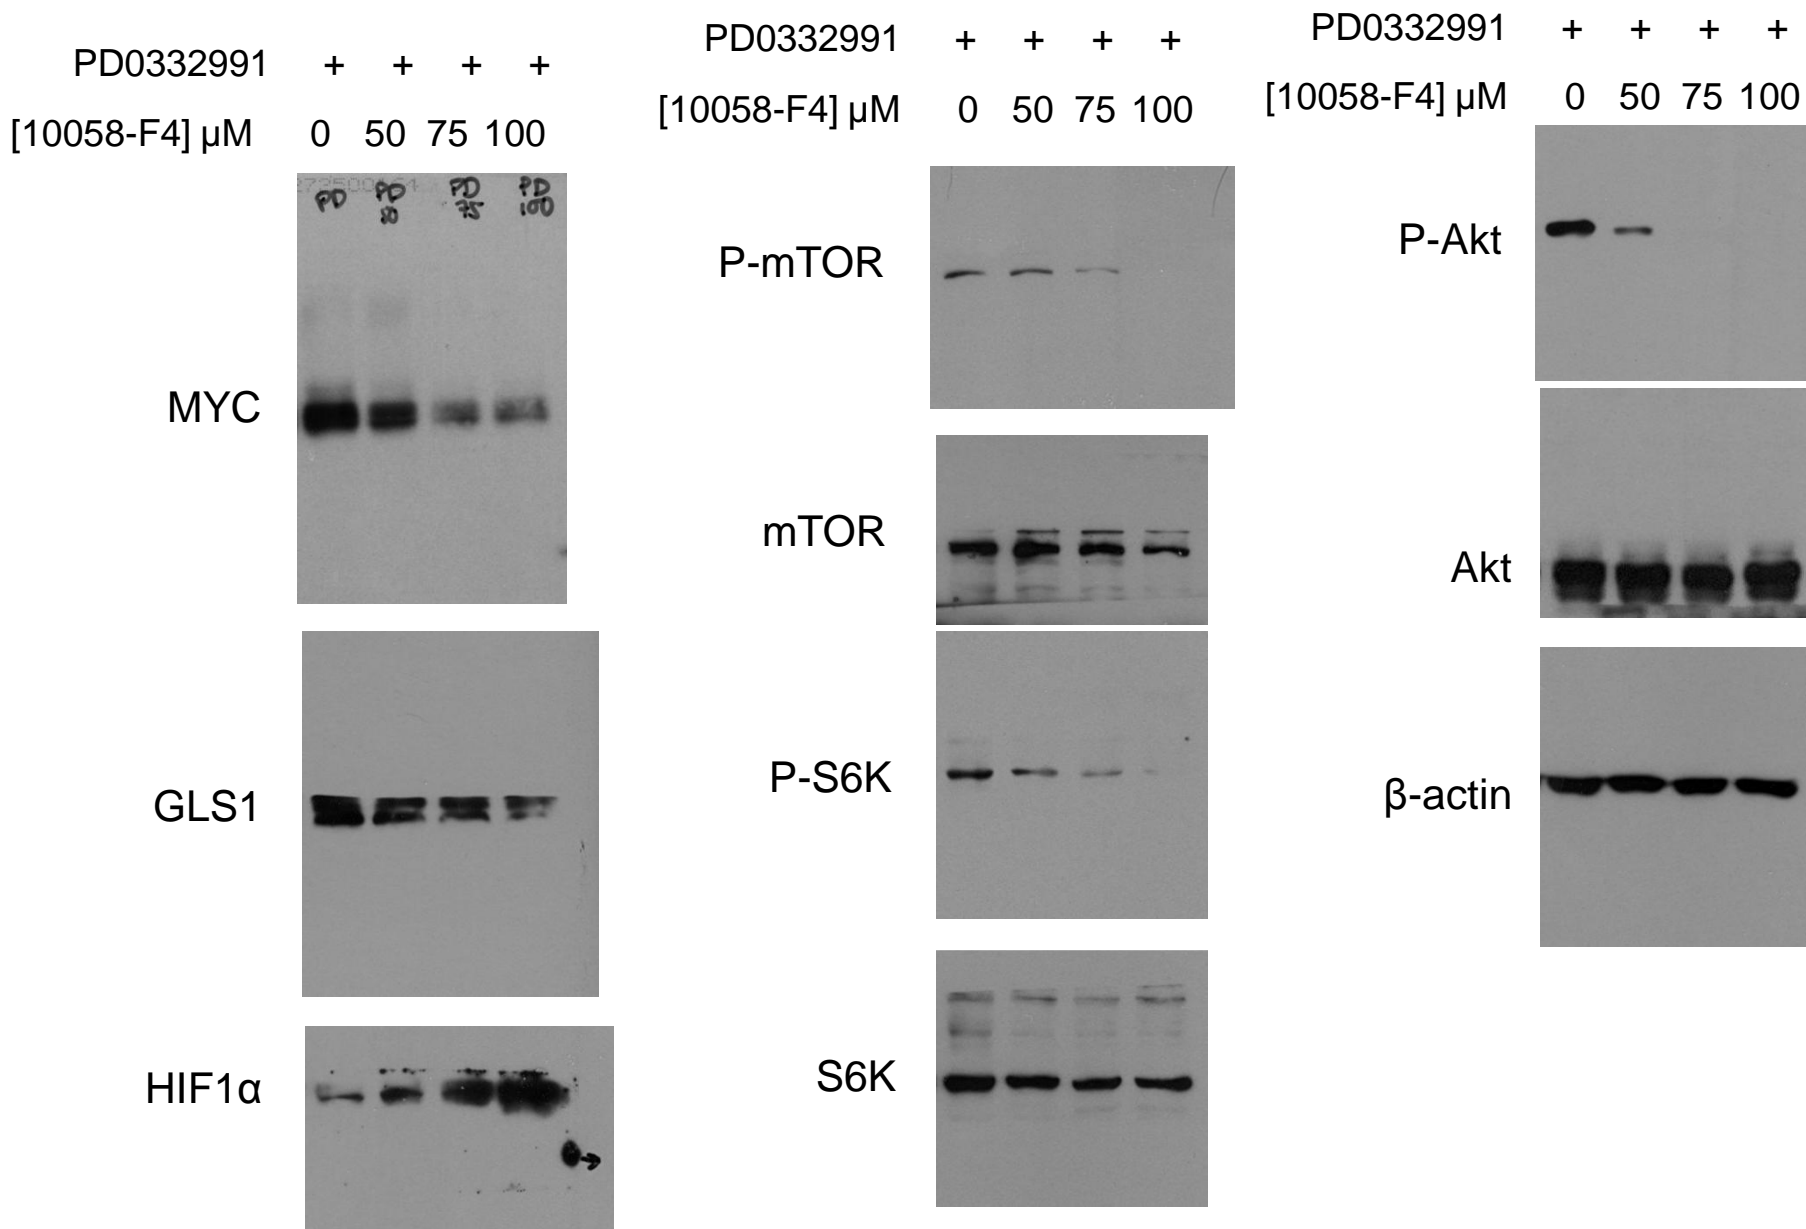

# Figure 6.E

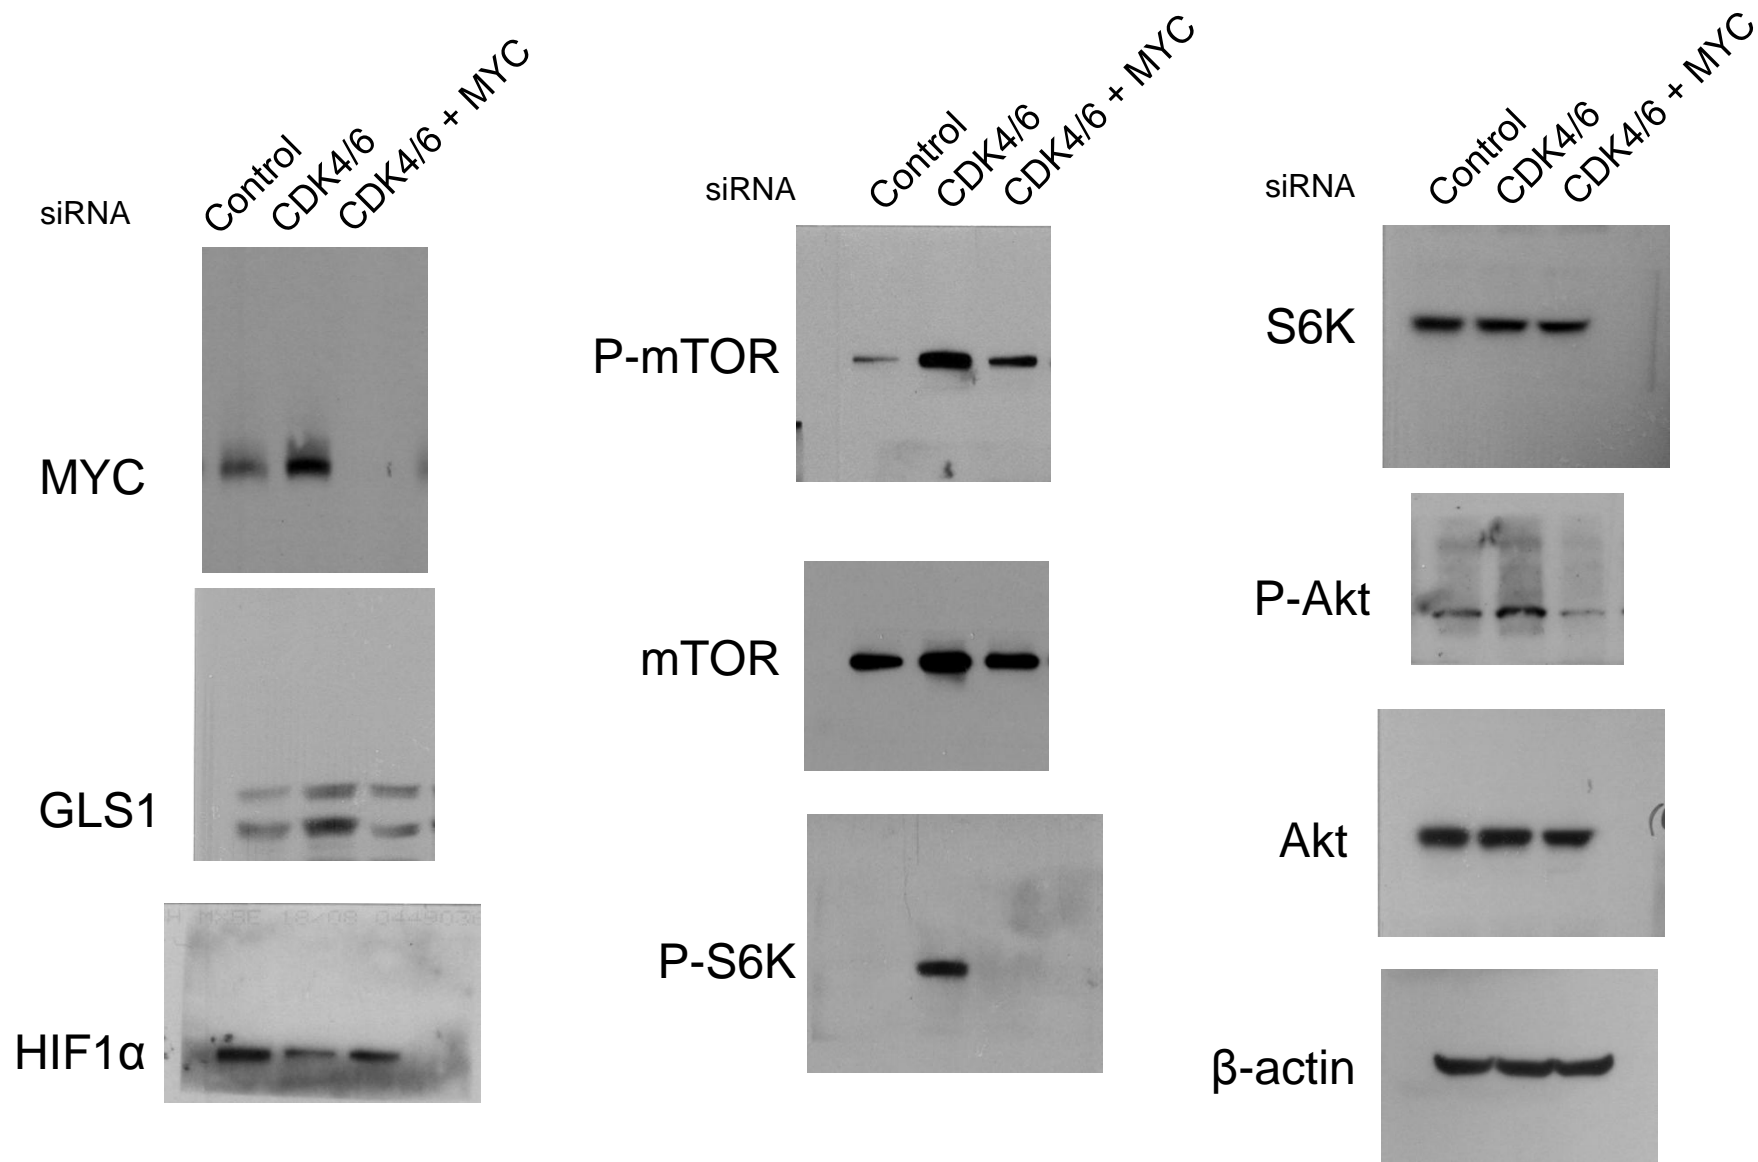

Supplement: MSB-13-940-s009.pdf [file MSB-13-940-s009.pdf]
